# Supplementary material for: Glial activation and inflammation along the Alzheimer’s disease continuum
Source: Springer Nature journal article supplement (doi:10.1186/s12974-019-1399-2), 2019-02-21
Supplement: MOESM2 [file 16497958]

**Supplementary figure 1: Correlation between CSF YKL-40 and age.**

**A** Healthy controls

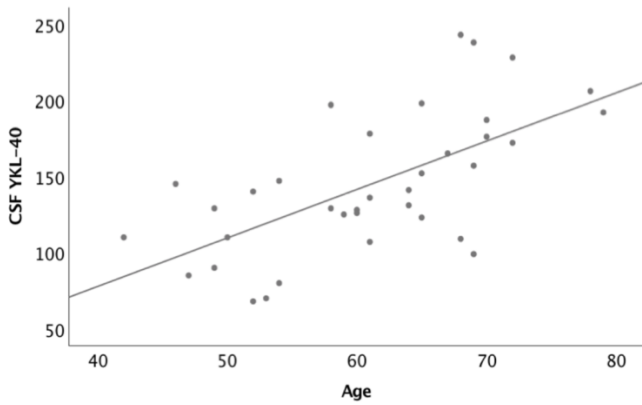

**B** All groups combined

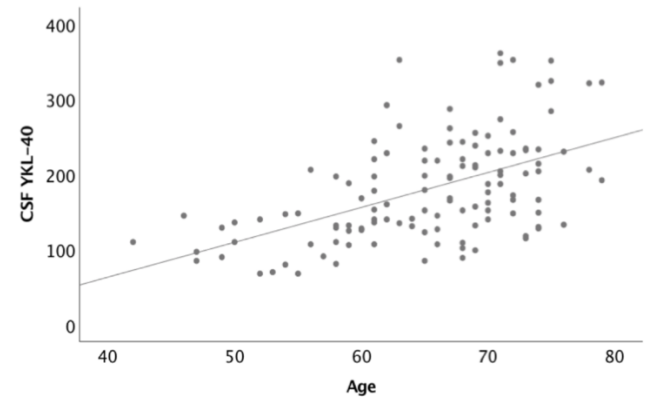

CSF YKL-40 (ng/ml) is correlated to age in healthy controls (A) and all groups combined (B). In simple linear regression CSF YKL-40 show a strong correlation with age among healthy controls ( $R^2 = .403$ ,  $F(1,34)=22.955$ ,  $p<.001$ ) and the combined cohort consisting of healthy controls, SCD, MCI and AD dementia ( $R^2 = .272$ ,  $F(1,119)=44.527$ ,  $p<.001$ ), visualized here as a scatter plot.
