# Supplementary material for: Glial activation and inflammation along the Alzheimer’s disease continuum
Source: Springer Nature journal article supplement (doi:10.1186/s12974-019-1399-2), 2019-02-21
Supplement: MOESM3 [file 16497958]

**Supplementary figure 2: Between-group comparisons of microglial- and astroglial activation with inflammation based on clinical staging**

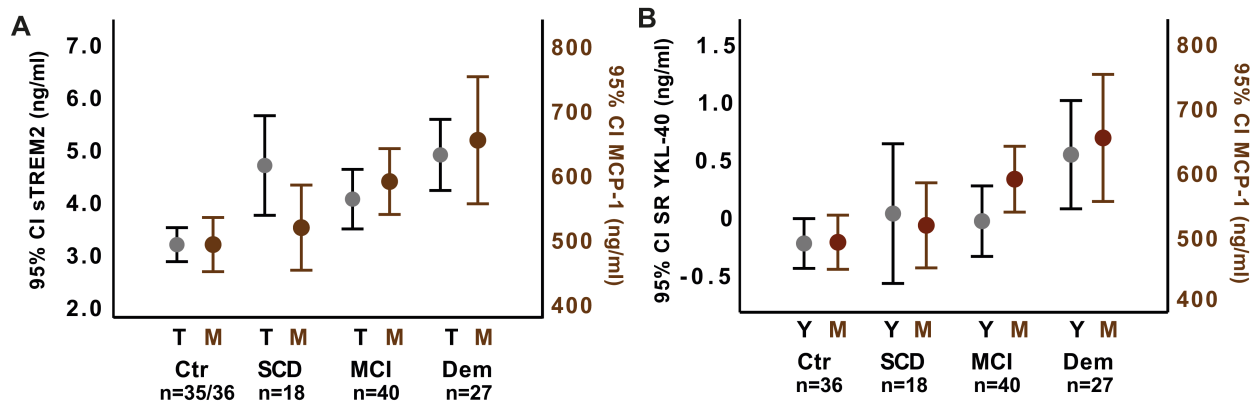

Error bars comparing the microglial (A) and astroglial (B) activation with the pathologic inflammatory response for clinical groups. Early microglial activation without a significant inflammatory response is illustrated by increased sTREM2 (T, black) at the SCD stage, while MCP-1 (M, red) is increased at the MCI stage (A). The astroglial activation marker (YKL-40, Y), however, is only significantly increased at the AD dementia stage (B). The Y-axis with sTREM2 and MCP-1 is reported as CSF concentrations in ng/ml, while the Y-axis for YKL-40 are residuals standardized (SR) for age. Error bars are shown as mean and 95% confidence interval (CI). Abbreviation: Ctr: healthy controls (n=36), SCD: CSF A $\beta$ 42+ subjects with subjective cognitive decline (n=19), MCI: CSF A $\beta$ 42+ subjects with mild cognitive impairment (n=39), Dem: A $\beta$ 42+ subjects with Alzheimer's disease dementia (n=27), T: sTREM2, M: MCP-1, Y: YKL-40.
